# Supplementary material for: Membrane association of the bacterial riboregulator Hfq and functional perspectives
Source: PubMed Central journal article supplement (PMC5587644; doi:10.1038/s41598-017-11157-5), 2017-09-06
Supplement: 41598_2017_11157_MOESM1_ESM.pdf [file 41598_2017_11157_MOESM1_ESM.pdf]

# **Supplementary material**

## **Membrane association of the bacterial riboregulator Hfq and functional perspectives**

Antoine Malabirade, Javier Morgado-Brajones, Sylvain Trépout, Frank Wien, Ileana Marquez, Jérôme Seguin, Sergio Marco, Marisela Velez and Véronique Arluison

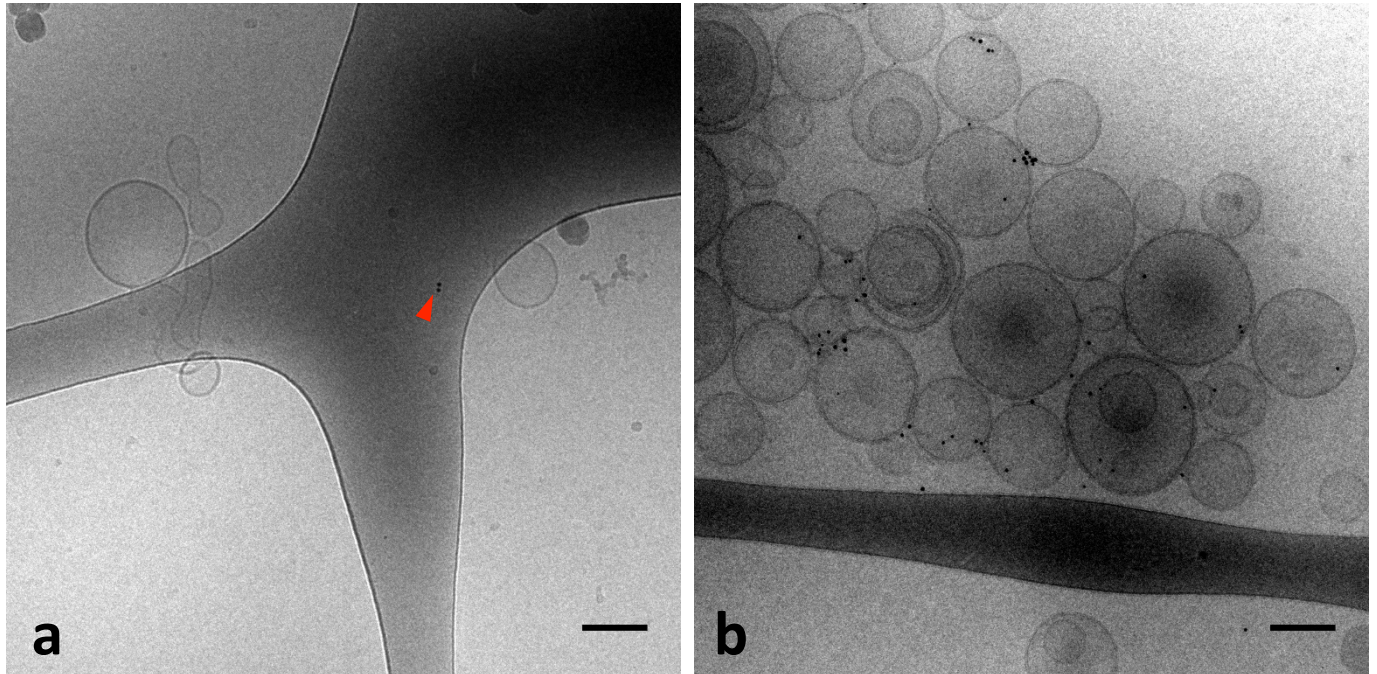

**Fig. S1:** *a.* EPE SUVs and 4nM NiNTA-NanoGold beads. The few beads found do not bind lipidic membranes and prefer to stick to the carbon film (red arrow). *b.* EPE SUVs incubated with wild-type Hfq and 4nM NiNTA-NanoGold beads. The four Histidines naturally present in the C-terminal tails of Hfq are sufficient to bind some beads, indicating that His-tag labelling does not significantly influence the protein-membrane interaction. Scale bars 100 nm.

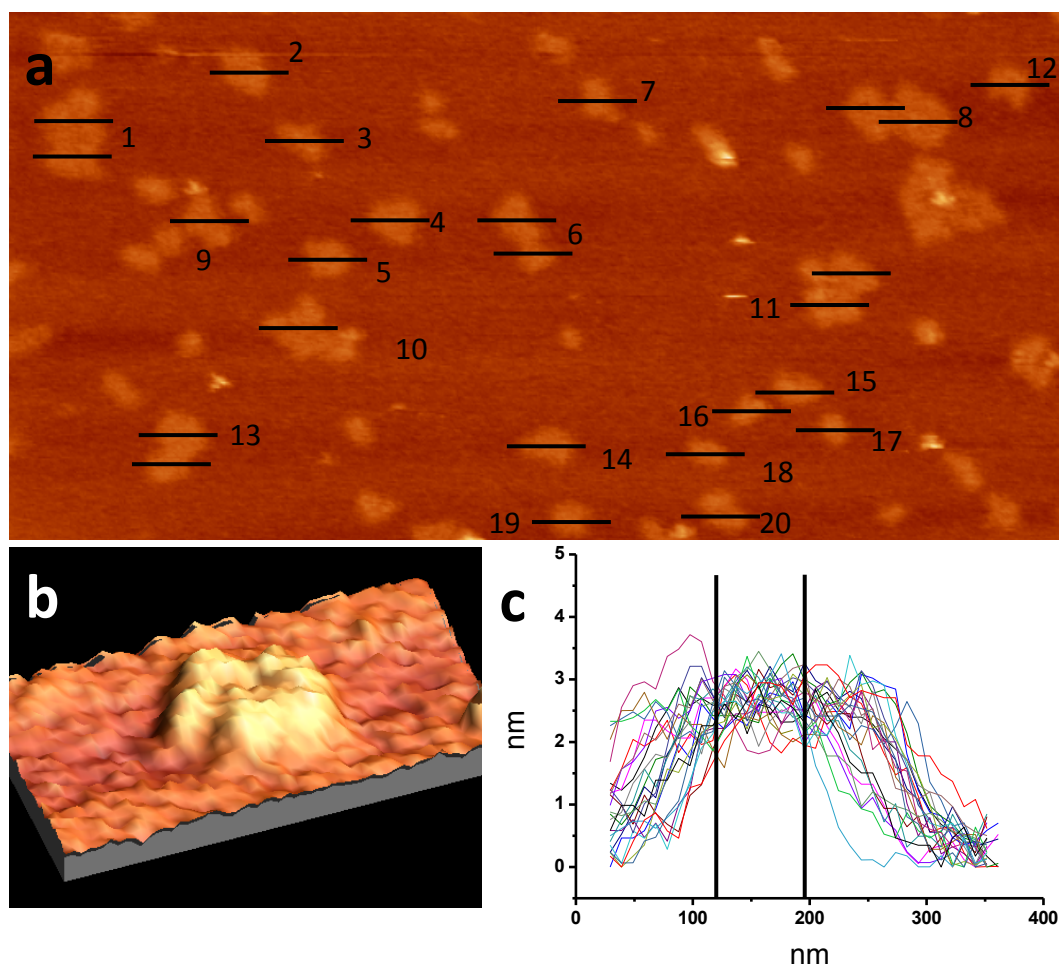

**Fig. S2: Height measurement of Hfq aggregates on an EPE lipid bilayer by liquid AFM.** **a.** Aggregates and profiles used to obtain the average height. **b.** The 3D representation of one aggregate shows that the surface is not flat. **c.** Compilation of all the profiles used. We selected the highest profile of each aggregate, which is shown as a black line in panel a, and the plateau region that was selected to average is indicated between two lines in panel c. The average height measured from 20 aggregates is  $2.7 \pm 0.2$  nm.

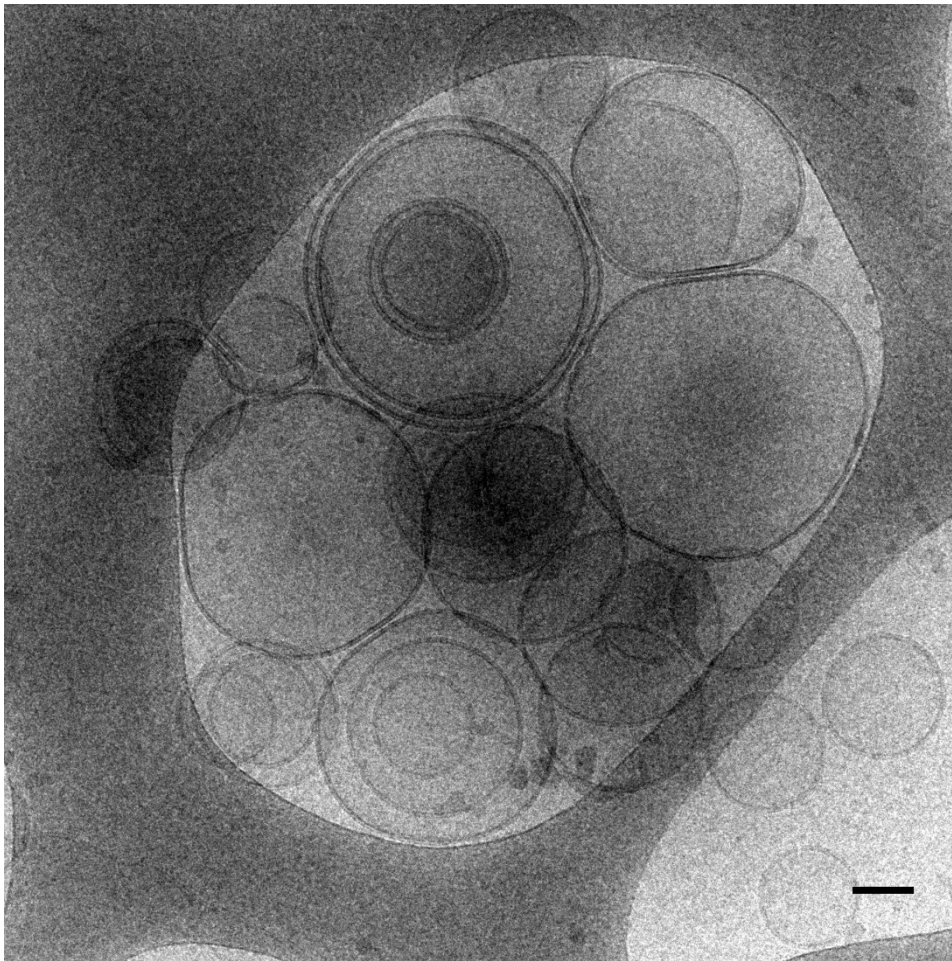

**Fig. S3: Experiment with Hfq-NTR<sub>65</sub>.** Cryo-TEM image showing that the truncated torus is able to bind and regroup some liposomes but without visible effect on the membrane thickness. Scale bar: 50 nm.



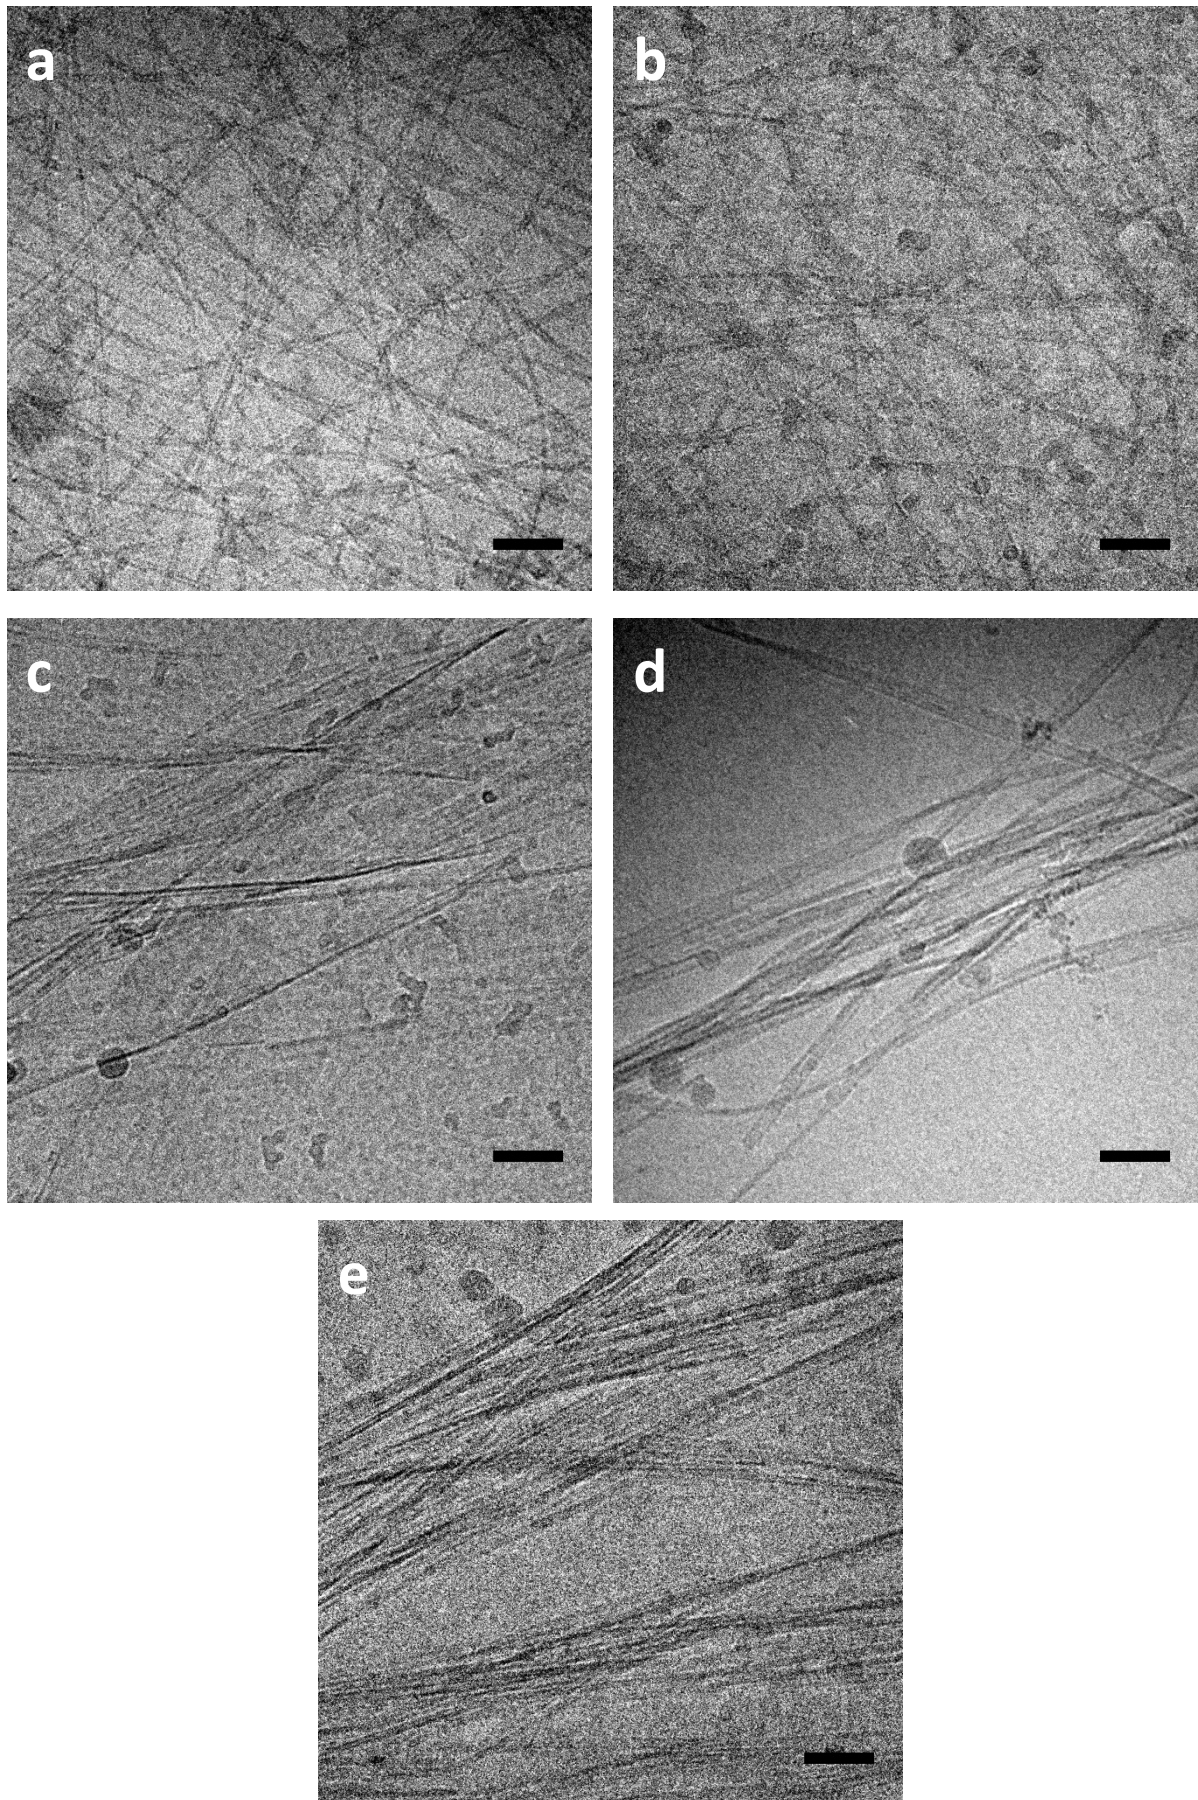

**Fig. S4: Hfq-CTR peptides successfully tested for amyloid fibers formation by Cryo-TEM. a-e:** Hfq-CTR<sub>38</sub>, Hfq-CTR<sub>26</sub>, Hfq-CTR<sub>17a</sub>, Hfq-CTR<sub>17b</sub>, Hfq-CTR<sub>11</sub> respectively. Concentration 0.5 g.L<sup>-1</sup>, scale bar 50 nm.

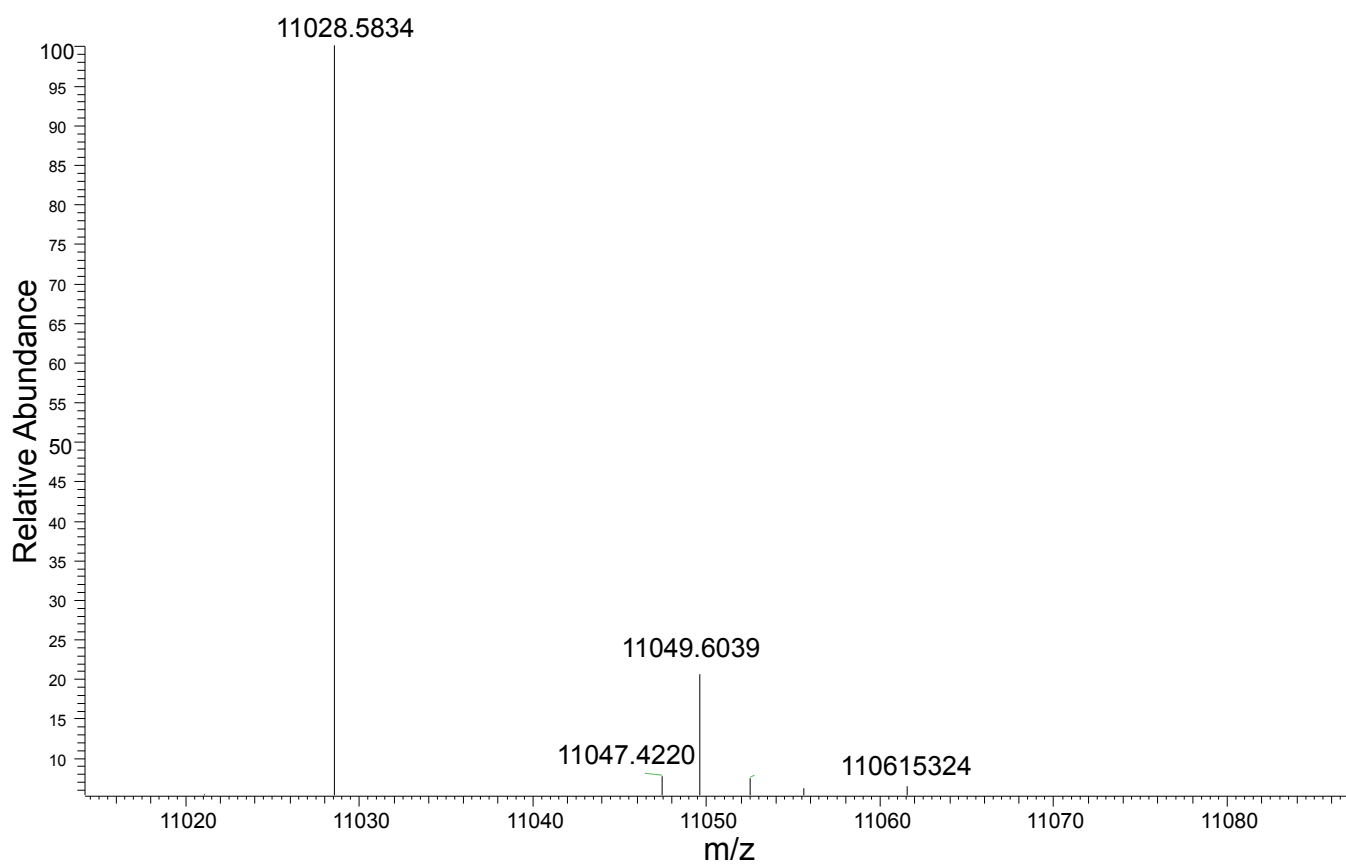

**Fig. S5: Mono-isotopic deconvolved spectra of ESI/Orbitrap Mass-Spectrometry on purified native Hfq.** The majoritary pic at 11028.58 Da corresponds to a monomer of native Hfq (in accordance with ExPASy Compute pI/Mw: 11 028,54 Da). The 11049.60 Da pic probably corresponds to Hfq+Na<sup>+</sup>. The protein solution was exchanged on a C4-reverse phase Ziptip (Merck Millipore) with 60% acetonitrile in water before electrospray.

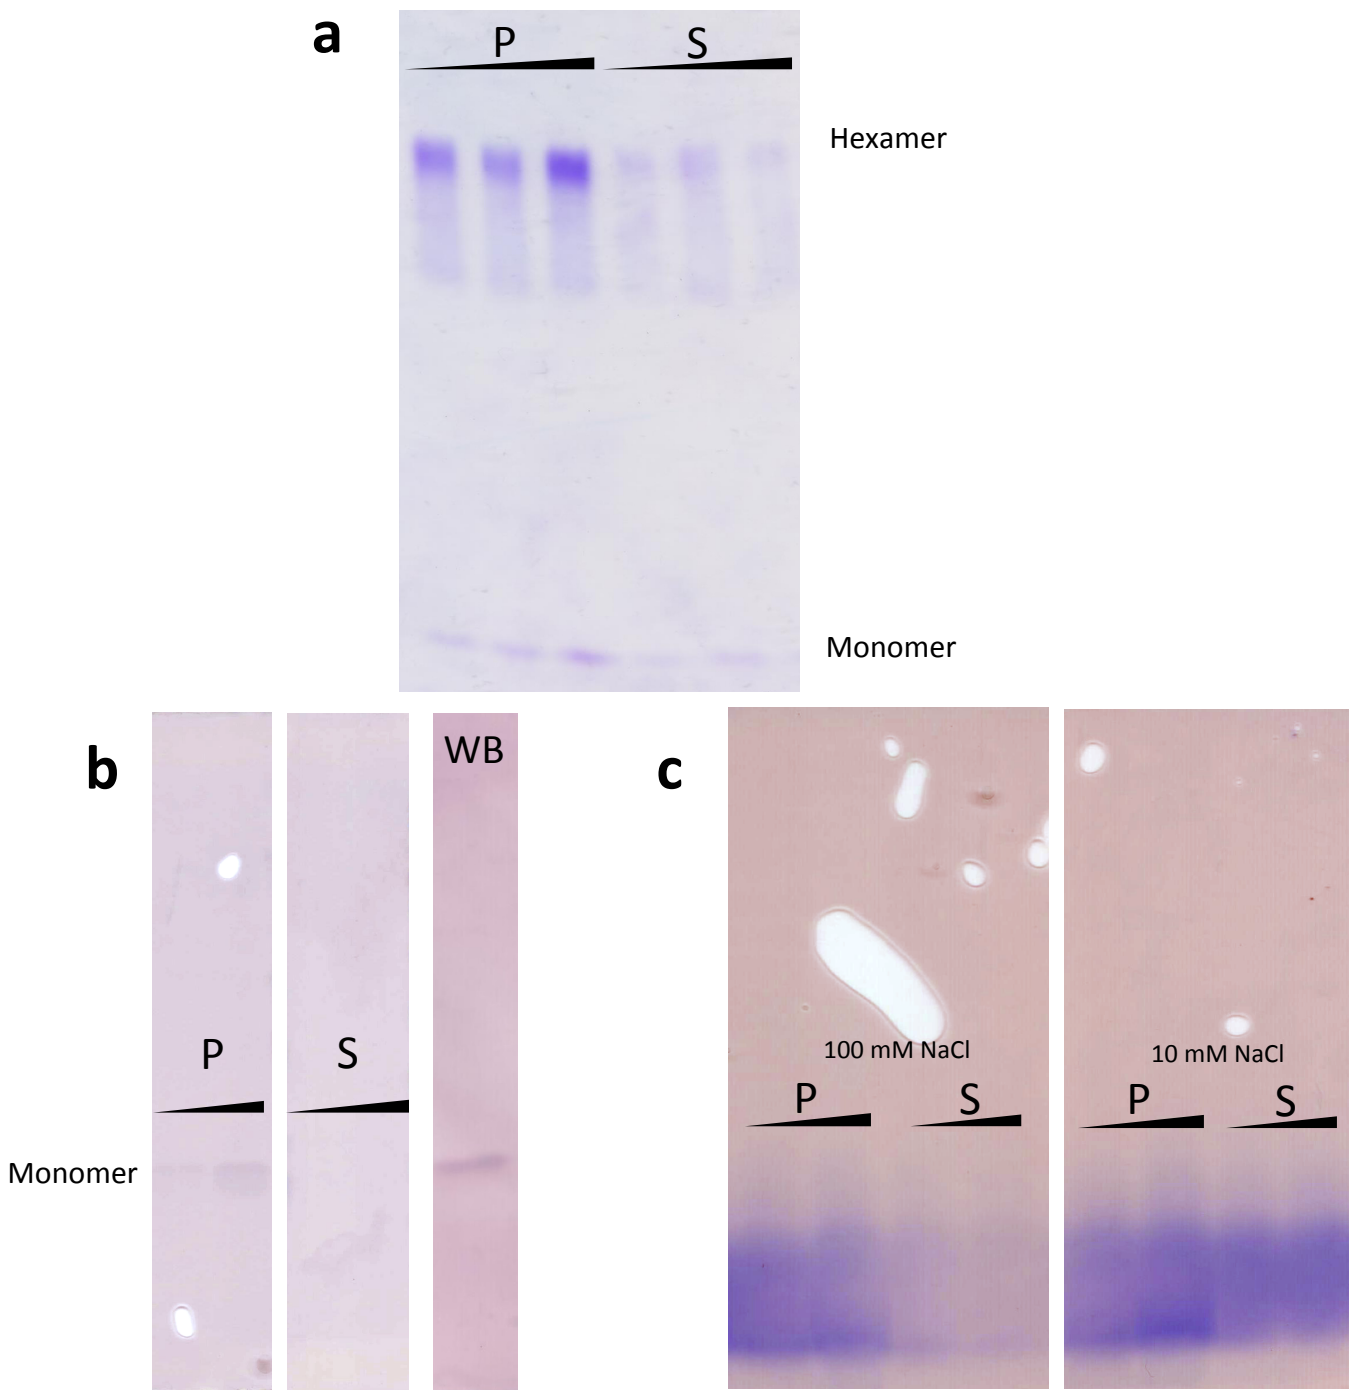

**Fig. S6: Full SDS-PAGE for Hfq co-sedimentation assay (EPE).** **a.** Wild-type Hfq with increasing concentrations of EPE (100, 300, 600 $\mu$ M); gel percentage 8-16%. **b.** Hfq-NTR<sub>65</sub> (EPE 300, 600 $\mu$ M); gel percentage 4-20%. **c.** Hfq-CTR38 peptides (EPE 300, 600 $\mu$ M) in the presence of 100 and 10 mM NaCl; gel percentage 12%. P, Pellet fraction; S, Supernatant fraction. As previously described, WT Hfq hexamers are only partially denatured by SDS-PAGE and migrate mostly as hexamers, while truncated Hfq-NTR<sub>65</sub> is less stable and can be dissociated on the PAGE<sup>25,60,61</sup>. In **b**, a Western Blot (WB) is also provided to confirm the nature of Hfq-NTR<sub>65</sub> (rat anti-Hfq IgG).

**Sup Table S1: Hfq CTR peptides tested for amyloidogenic assembly**

| Region                 | Amino acid sequence                                               | Amyloid fibers |
|------------------------|-------------------------------------------------------------------|----------------|
| Hfq Wild               | MAKGQSLQDPFLNALRRERVPVSIYLVNGIKLQGQIESFD                          |                |
| Type                   | QFVILLKNTVSQMVKHAISTVVPSRPVSHHSNNAGGGT<br>SSNYHHGSSAQNTSAQQDSEETE |                |
| Hfq-CTR <sub>38</sub>  | SRPVSHHSNNAGGGTSSNYHHGSSAQNTSAQQDSEETE                            | <b>Yes</b>     |
| -                      | SRPVSHHSNNAGGGT                                                   | No             |
| Hfq-CTR <sub>26</sub>  | GGTSSNYHHGSSAQNTSAQQDSEETE                                        | <b>Yes</b>     |
| -                      | VSHHSNNAGGGTSSNYHHGS                                              | No             |
| -                      | GTSSNYHHGSSAQNTSA                                                 | No             |
| Hfq-CTR <sub>17a</sub> | GSSAQNTSAQQDSEETE                                                 | <b>Yes</b>     |
| Hfq-CTR <sub>17b</sub> | NYHHGSSAQNTSAQQDS                                                 | <b>Yes</b>     |
| -                      | NTSAQQDSEETE                                                      | No             |
| -                      | SAQQDSEETE                                                        | No             |
| Hfq-CTR <sub>11</sub>  | SAQNTSAQQDS                                                       | <b>Yes</b>     |
